# Supplementary material for: Electropolymerization of robust conjugated microporous polymer membranes for rapid solvent transport and narrow molecular sieving
Source: PubMed Central journal article supplement (PMC7578036; doi:10.1038/s41467-020-19182-1), 2020-10-21
Supplement: 41467_2020_19182_MOESM3_ESM.pdf [file 41467_2020_19182_MOESM3_ESM.pdf]

## **Description of Additional Supplementary Files**

File Name: Supplementary Movie 1

Description: Movie to show a CNT-EP-PC membrane holding substantial weight without break

File Name: Supplementary Movie 2

Description: Movie to show a CNT-EP-PC membrane bearing substantial bending without break.

File Name: Supplementary Movie 3

Description: Movie to show the dual super-hydrophobicity and super-oleophilicity of the CNT-EP-PC membrane
